# Supplementary material for: CoO microspheres and metallic Co evolved from hexagonal α-Co(OH)2 plates in a hydrothermal process for lithium storage and magnetic applications
Source: Royal Society of Chemistry journal article supplement (doi:10.1039/c7cp06868a), 2017-12-01
Supplement: c7cp06868a1.pdf [file c7cp06868a1.pdf]

# **CoO microspheres and metallic Co evolved from hexagonal $\alpha$ -Co(OH)<sub>2</sub> plates in a hydrothermal process for lithium storage and magnetic application**

KeYuan Ma<sup>1</sup>, F. Liu<sup>1</sup>, Y.F. Yuan<sup>2</sup>, X.Q. Liu<sup>3</sup>, Jun Wang<sup>4</sup>, J. Xie<sup>1</sup> and J.P. Cheng<sup>1,\*</sup>

<sup>1</sup> State Key Laboratory of Silicon Materials, School of Materials Science & Engineering, Key Laboratory of Advanced Materials and Applications for Batteries of Zhejiang Province, Zhejiang University, Hangzhou 310027, China.

<sup>2</sup> College of Machinery and Automation, Zhejiang Sci-Tech University, Hangzhou 310018, China.

<sup>3</sup> Laboratory of Dielectric Materials, School of Materials Science & Engineering, Zhejiang University, Hangzhou 310027, China.

<sup>4</sup> School of Physical Science and Technology, Lanzhou University, Lanzhou 730000, China.

\*Corresponding author. E-mail address: chengjp@zju.edu.cn, Tel./fax: +86-571-87951411.

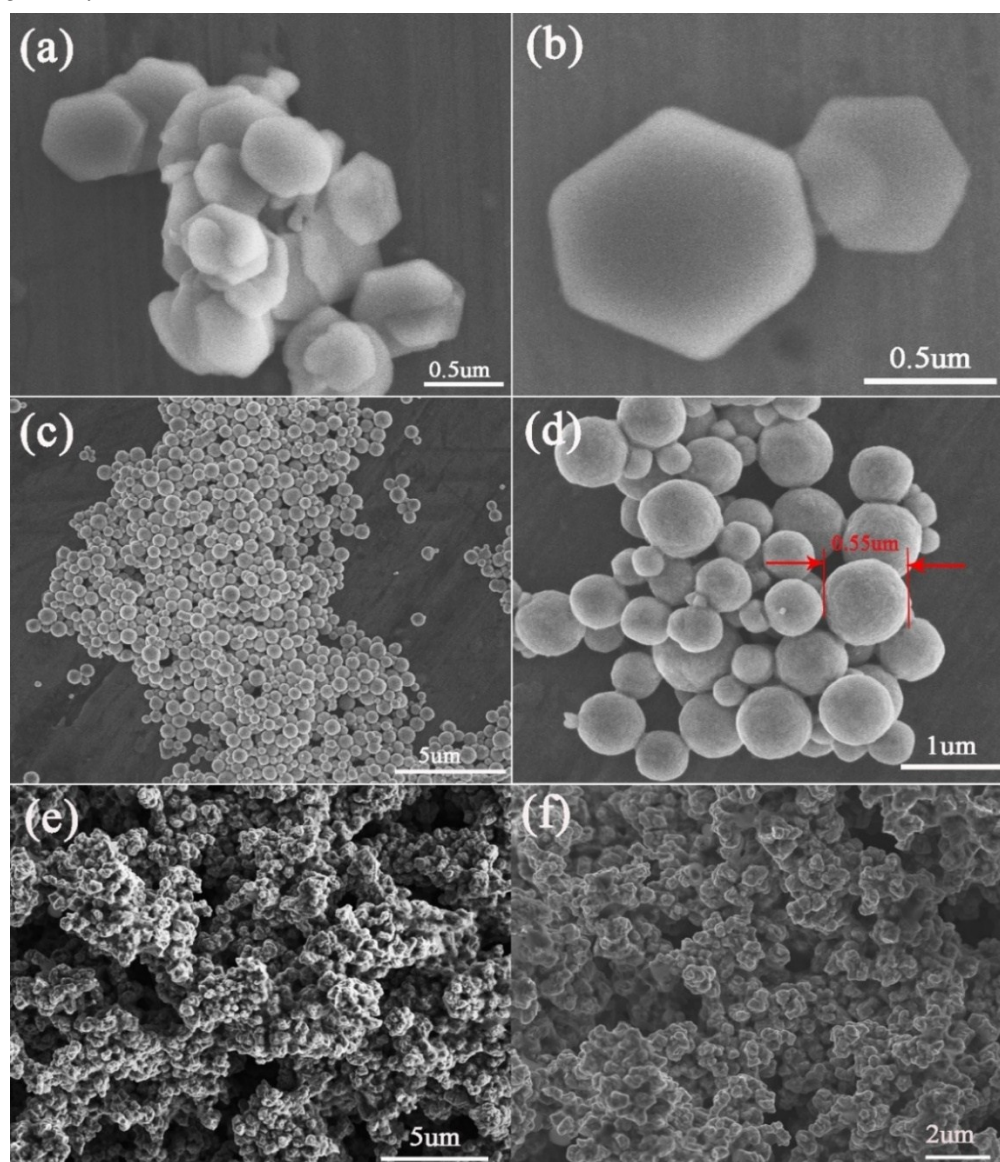

S-Figure 1 SEM images for Co(OH)<sub>2</sub> (a-b) , CoO (c-d) and Co (e-f).

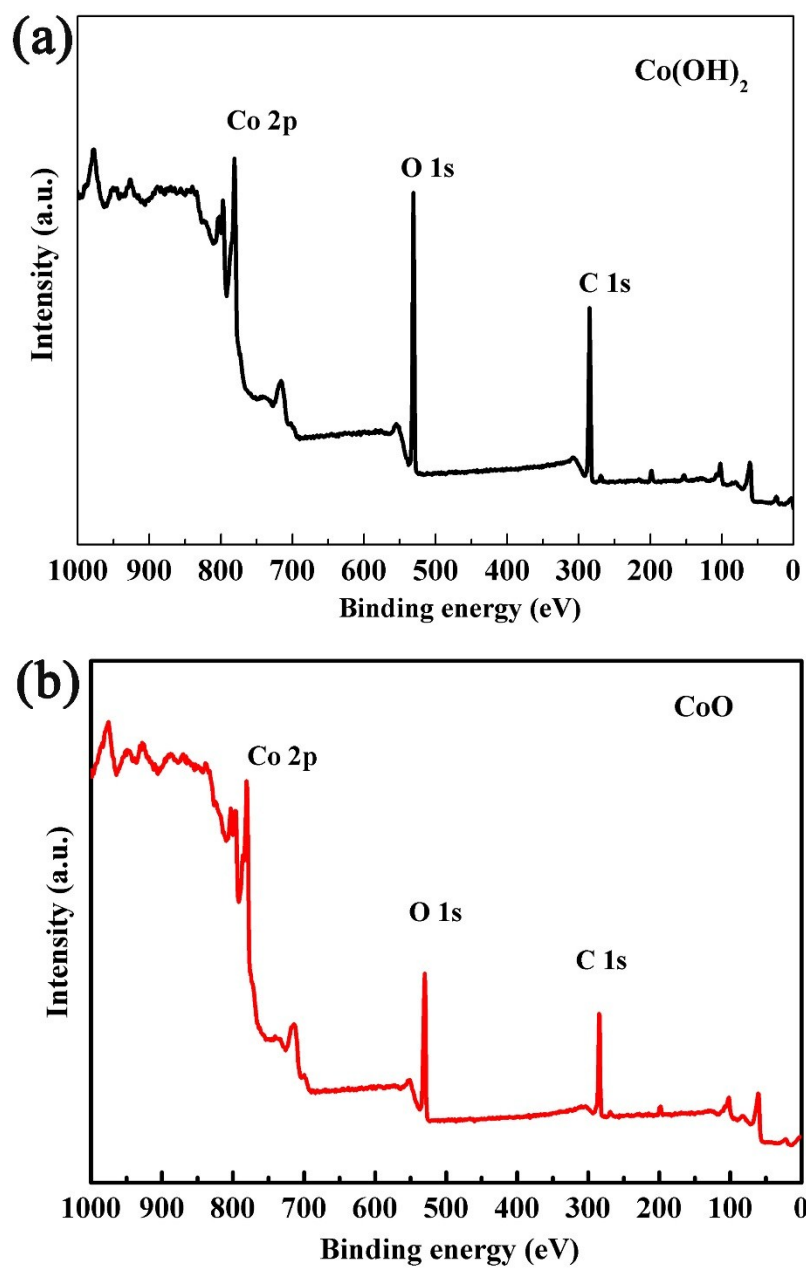

S-Figure 2 XPS full spectra survey of  $\text{Co(OH)}_2$  (a) and CoO (b) sample.

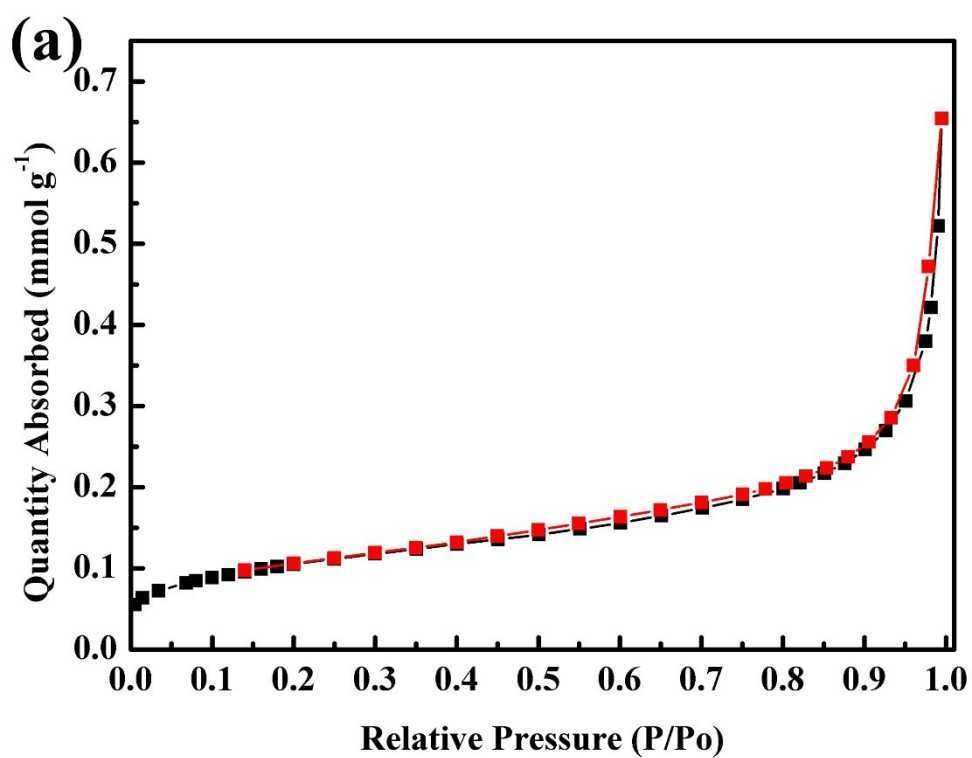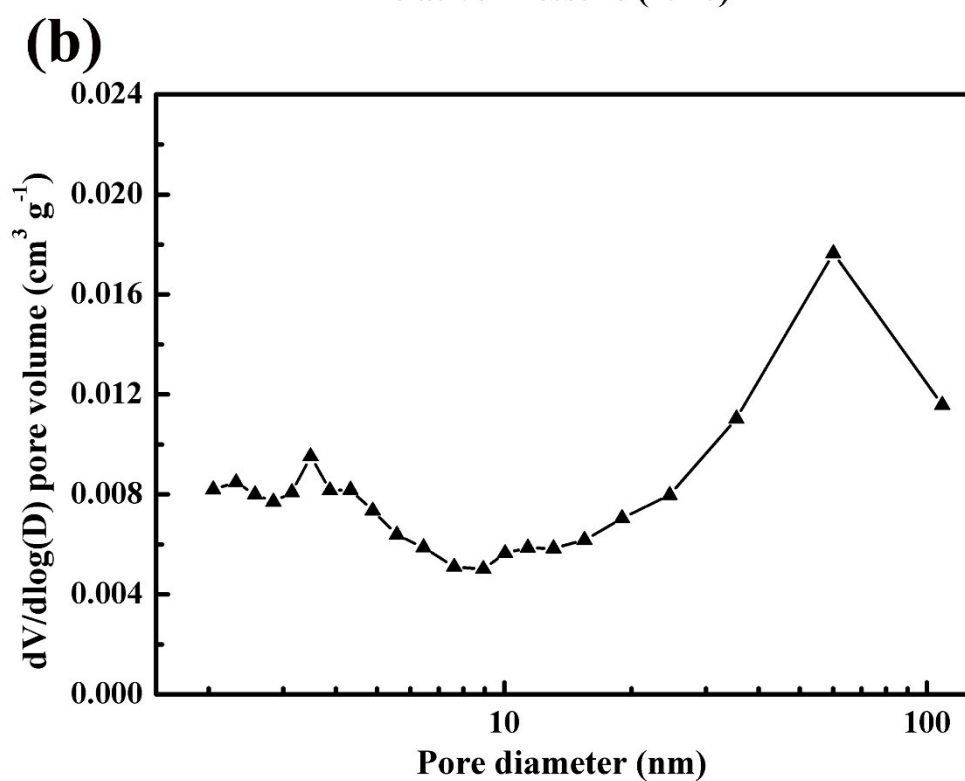

S-Figure 3 **(a)** Nitrogen sorption isotherms of the CoO microspheres, and **(b)** pore size distribution curve.
